# Supplementary material for: A facile synthesis of branched poly(ethylene glycol) and its heterobifunctional derivatives
Source: Royal Society of Chemistry journal article supplement (doi:10.1039/c0py00339e), 2011-01-01
Supplement: c0py00339e.pdf [file c0py00339e.pdf]

Supporting information for:

**A Facile Synthesis of Branched Poly(ethylene glycol) and Its  
Heterobifunctional Derivatives**

**Zhongyu Li, Ying Chau\***

*Department of Chemical and Biomolecular Engineering, the Hong Kong University of Science and  
Technology, Clear Water Bay, Hong Kong SAR, China*

<sup>10</sup> \*Corresponding author. Tel.: +852-2358 8935; Fax: +852-2358 0054

Email address: [ying.chau@ust.hk](mailto:ying.chau@ust.hk)

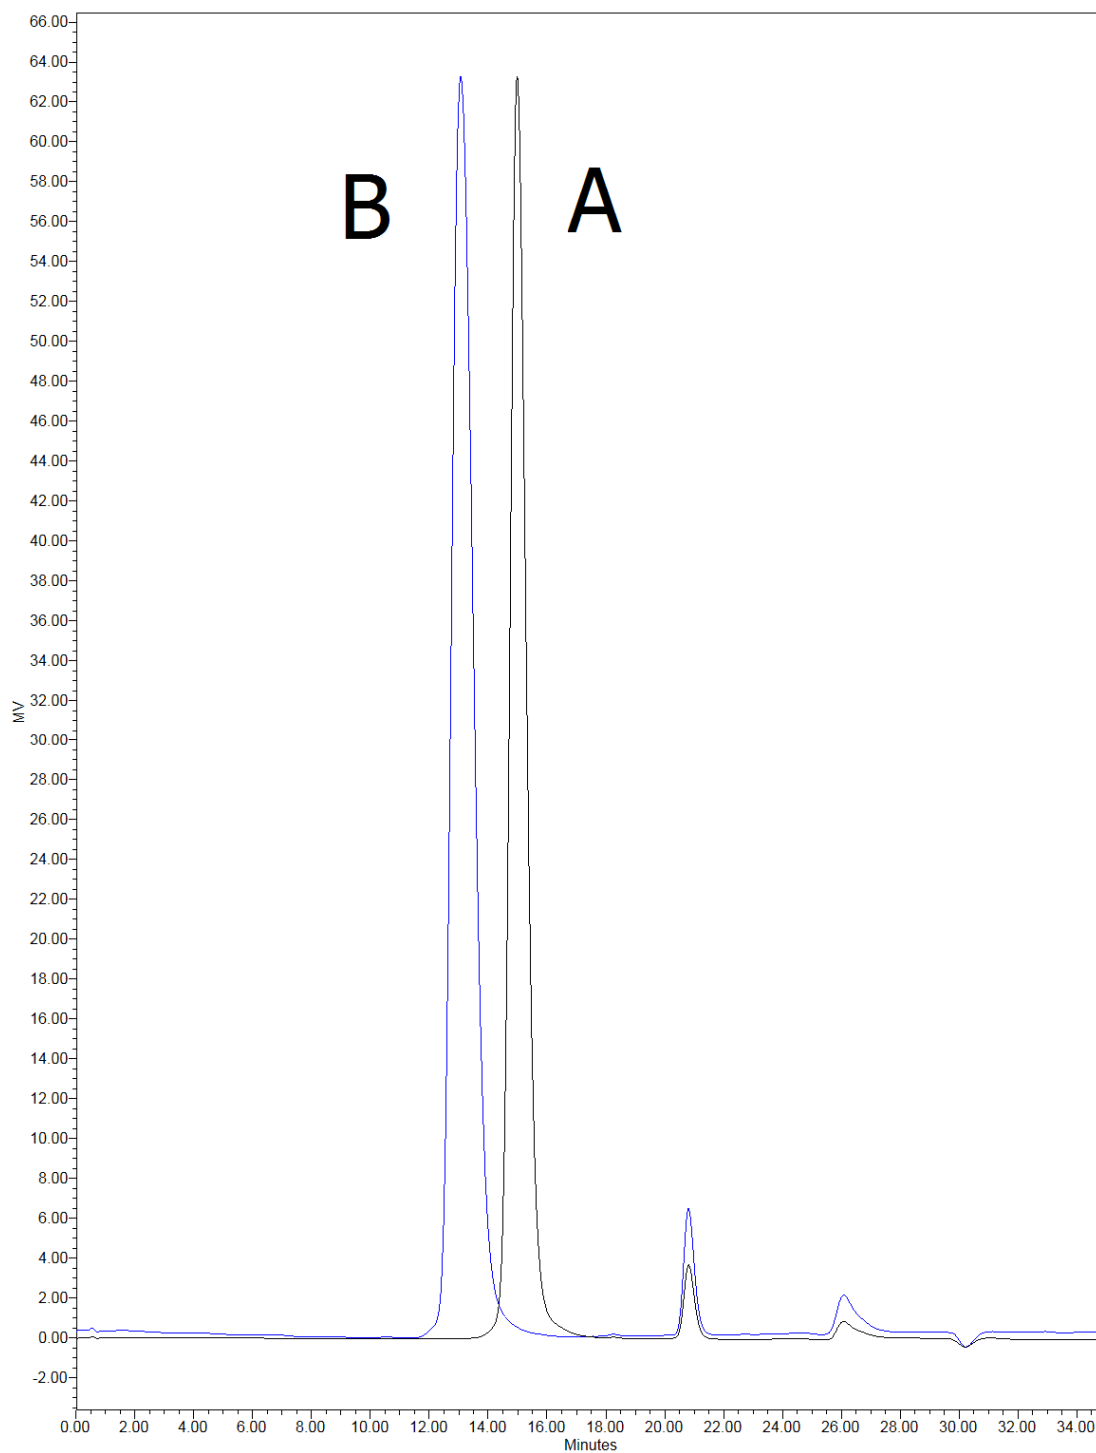

**Fig.S1** SEC trace of allyl-(PEG-OH)<sub>2</sub>, A:  $M_n = 5.27 \times 10^3$ , PDI = 1.08; B:  $M_n = 20.85 \times 10^3$ , PDI = 1.09.
